# Supplementary material for: Low-Dose Versus Standard Dose of Bacillus Calmette-Guerin in the Treatment of Nonmuscle Invasive Bladder Cancer: A Systematic Review and Meta-Analysis
Source: PubMed Central journal article supplement — Medicine (Baltimore). 2015 Dec 11;94(49):e2176. doi: 10.1097/MD.0000000000002176 (PMC5008490; doi:10.1097/md.0000000000002176), 2015-12-11

(a) Frequency

| Study or Subgroup                                                                                           | Low dose |             | Standard dose |            | Weight        | Risk Ratio               |      | Year |
|-------------------------------------------------------------------------------------------------------------|----------|-------------|---------------|------------|---------------|--------------------------|------|------|
|                                                                                                             | Events   | Total       | Events        | Total      |               | M-H, Random, 95% CI      | Year |      |
| Martinez-Pineiro 2002                                                                                       | 65       | 247         | 124           | 252        | 31.8%         | 0.53 [0.42, 0.68]        | 2002 |      |
| Agrawal 2007                                                                                                | 24       | 88          | 24            | 40         | 26.2%         | 0.45 [0.30, 0.70]        | 2007 |      |
| Inamoto 2013                                                                                                | 3        | 18          | 6             | 20         | 8.9%          | 0.56 [0.16, 1.90]        | 2013 |      |
| Odeens J 2013                                                                                               | 150      | 657         | 160           | 659        | 33.1%         | 0.94 [0.77, 1.14]        | 2013 |      |
| <b>Total (95% CI)</b>                                                                                       |          | <b>1010</b> |               | <b>971</b> | <b>100.0%</b> | <b>0.62 [0.41, 0.95]</b> |      |      |
| Total events                                                                                                | 242      |             | 314           |            |               |                          |      |      |
| Heterogeneity: Tau <sup>2</sup> = 0.13; Chi <sup>2</sup> = 17.71, df = 3 (P = 0.0005); I <sup>2</sup> = 83% |          |             |               |            |               |                          |      |      |
| Test for overall effect: Z = 2.21 (P = 0.03)                                                                |          |             |               |            |               |                          |      |      |

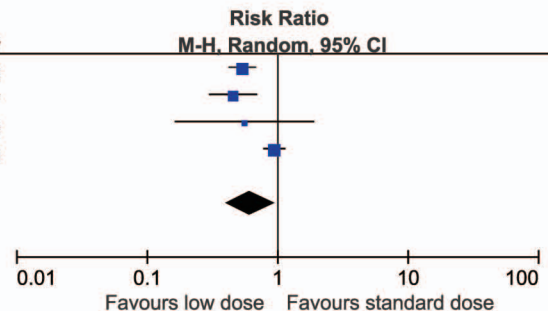

(b) Hematuria

| Study or Subgroup                                                                                            | Low dose |             | Standard dose |             | Weight        | Risk Ratio               |      | Year |
|--------------------------------------------------------------------------------------------------------------|----------|-------------|---------------|-------------|---------------|--------------------------|------|------|
|                                                                                                              | Events   | Total       | Events        | Total       |               | M-H, Random, 95% CI      | Year |      |
| Martinez-Pineiro 2002                                                                                        | 40       | 247         | 90            | 252         | 28.8%         | 0.45 [0.33, 0.63]        | 2002 |      |
| Irie 2003                                                                                                    | 3        | 39          | 7             | 41          | 15.1%         | 0.45 [0.13, 1.62]        | 2003 |      |
| Agrawal 2007                                                                                                 | 4        | 88          | 12            | 40          | 17.9%         | 0.15 [0.05, 0.44]        | 2007 |      |
| Odeens J 2013                                                                                                | 150      | 657         | 148           | 659         | 30.0%         | 1.02 [0.83, 1.24]        | 2013 |      |
| Inamoto 2013                                                                                                 | 4        | 18          | 1             | 20          | 8.2%          | 4.44 [0.55, 36.18]       | 2013 |      |
| <b>Total (95% CI)</b>                                                                                        |          | <b>1049</b> |               | <b>1012</b> | <b>100.0%</b> | <b>0.57 [0.28, 1.15]</b> |      |      |
| Total events                                                                                                 | 201      |             | 258           |             |               |                          |      |      |
| Heterogeneity: Tau <sup>2</sup> = 0.41; Chi <sup>2</sup> = 29.69, df = 4 (P < 0.00001); I <sup>2</sup> = 87% |          |             |               |             |               |                          |      |      |
| Test for overall effect: Z = 1.57 (P = 0.12)                                                                 |          |             |               |             |               |                          |      |      |

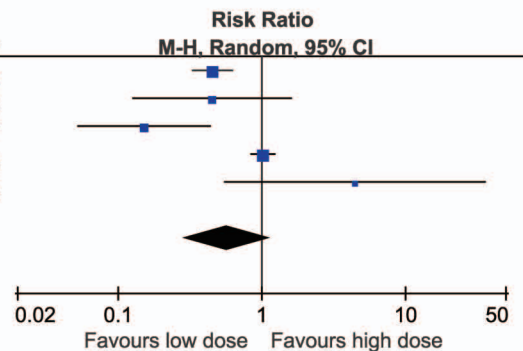

(c) Cystitis

| Study or Subgroup                                                                                            | Low dose |            | Standard dose |            | Weight        | Risk Ratio               |      | Year |
|--------------------------------------------------------------------------------------------------------------|----------|------------|---------------|------------|---------------|--------------------------|------|------|
|                                                                                                              | Events   | Total      | Events        | Total      |               | M-H, Random, 95% CI      | Year |      |
| Martinez-Pineiro 2002                                                                                        | 34       | 247        | 84            | 252        | 48.1%         | 0.41 [0.29, 0.59]        | 2002 |      |
| Odeens J 2013                                                                                                | 382      | 657        | 385           | 659        | 51.9%         | 1.00 [0.91, 1.09]        | 2013 |      |
| <b>Total (95% CI)</b>                                                                                        |          | <b>904</b> |               | <b>911</b> | <b>100.0%</b> | <b>0.65 [0.27, 1.59]</b> |      |      |
| Total events                                                                                                 | 416      |            | 469           |            |               |                          |      |      |
| Heterogeneity: Tau <sup>2</sup> = 0.40; Chi <sup>2</sup> = 23.34, df = 1 (P < 0.00001); I <sup>2</sup> = 96% |          |            |               |            |               |                          |      |      |
| Test for overall effect: Z = 0.94 (P = 0.35)                                                                 |          |            |               |            |               |                          |      |      |

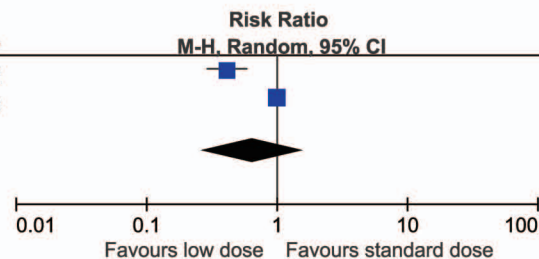

## (a) Fever

| Study or Subgroup                                                                                        | Low dose |             | Standard dose |             | Weight        | Risk Ratio          |                     |      |
|----------------------------------------------------------------------------------------------------------|----------|-------------|---------------|-------------|---------------|---------------------|---------------------|------|
|                                                                                                          | Events   | Total       | Events        | Total       |               | M-H, Random, 95% CI | Year                |      |
| Martinez-Pineiro 2002                                                                                    | 32       | 247         | 68            | 252         | 31.7%         | 0.48                | [0.33, 0.70]        | 2002 |
| Irie 2003                                                                                                | 2        | 39          | 5             | 41          | 5.0%          | 0.42                | [0.09, 2.04]        | 2003 |
| Agrawal 2007                                                                                             | 16       | 88          | 24            | 40          | 25.1%         | 0.30                | [0.18, 0.50]        | 2007 |
| Inamoto 2013                                                                                             | 2        | 18          | 7             | 20          | 5.9%          | 0.32                | [0.08, 1.34]        | 2013 |
| Odeens J 2013                                                                                            | 44       | 657         | 62            | 659         | 32.3%         | 0.71                | [0.49, 1.03]        | 2013 |
| <b>Total (95% CI)</b>                                                                                    |          | <b>1049</b> |               | <b>1012</b> | <b>100.0%</b> | <b>0.47</b>         | <b>[0.32, 0.68]</b> |      |
| Total events                                                                                             | 96       |             | 166           |             |               |                     |                     |      |
| Heterogeneity: Tau <sup>2</sup> = 0.08; Chi <sup>2</sup> = 7.76, df = 4 (P = 0.10); I <sup>2</sup> = 48% |          |             |               |             |               |                     |                     |      |
| Test for overall effect: Z = 3.95 (P < 0.0001)                                                           |          |             |               |             |               |                     |                     |      |

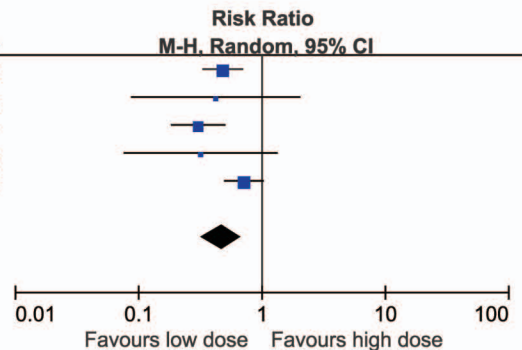

## (b) Malaise

| Study or Subgroup                                                                                        | Low dose |            | Standard dose |            | Weight        | Risk Ratio          |                     |      |
|----------------------------------------------------------------------------------------------------------|----------|------------|---------------|------------|---------------|---------------------|---------------------|------|
|                                                                                                          | Events   | Total      | Events        | Total      |               | M-H, Random, 95% CI | Year                |      |
| Martinez-Pineiro 2002                                                                                    | 21       | 247        | 41            | 252        | 30.3%         | 0.52                | [0.32, 0.86]        | 2002 |
| Agrawal 2007                                                                                             | 12       | 88         | 12            | 40         | 19.4%         | 0.45                | [0.22, 0.92]        | 2007 |
| Odeens J 2013                                                                                            | 91       | 657        | 113           | 659        | 50.3%         | 0.81                | [0.63, 1.04]        | 2013 |
| <b>Total (95% CI)</b>                                                                                    |          | <b>992</b> |               | <b>951</b> | <b>100.0%</b> | <b>0.63</b>         | <b>[0.44, 0.92]</b> |      |
| Total events                                                                                             | 124      |            | 166           |            |               |                     |                     |      |
| Heterogeneity: Tau <sup>2</sup> = 0.05; Chi <sup>2</sup> = 3.98, df = 2 (P = 0.14); I <sup>2</sup> = 50% |          |            |               |            |               |                     |                     |      |
| Test for overall effect: Z = 2.41 (P = 0.02)                                                             |          |            |               |            |               |                     |                     |      |

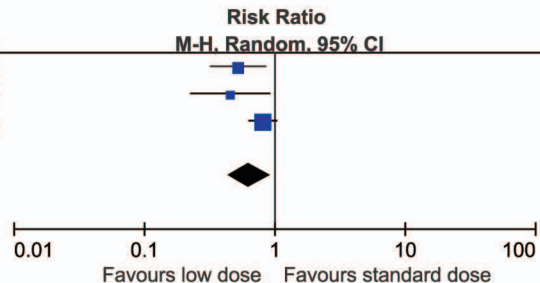

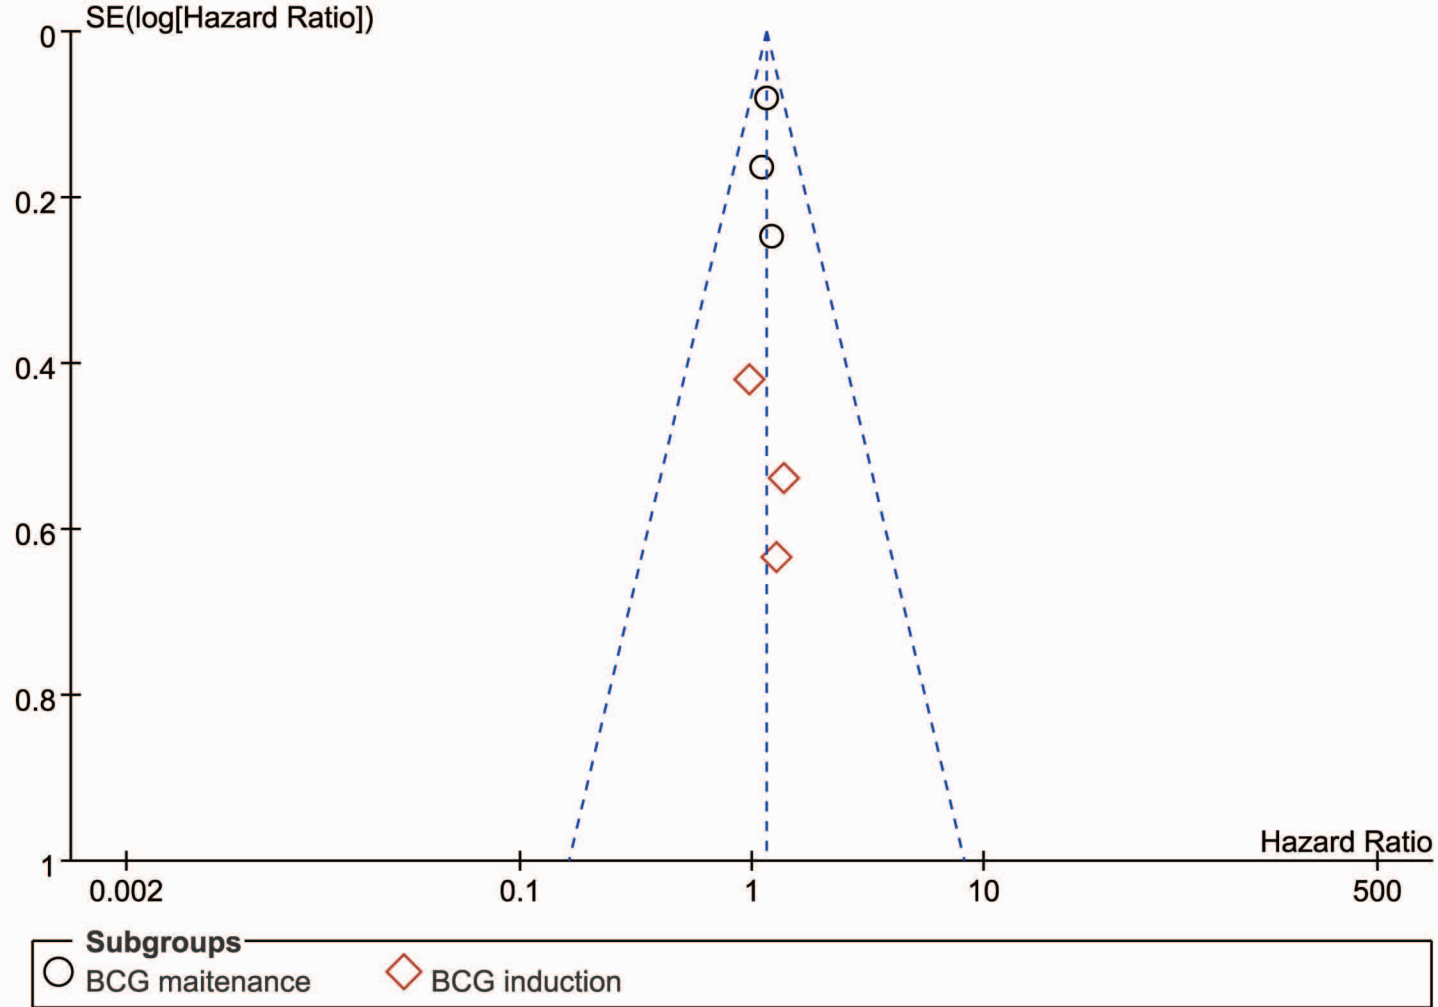

Supplement: medi-94-e2176-s002.pdf [file medi-94-e2176-s002.pdf]
